# Supplementary material for: Integrative analysis of genomic and epigenetic regulation of endometrial cancer
Source: publisher site journal article supplement (doi:10.18632/aging.103202), 2020-05-15
Supplement: Supplementary file [file aging-v12i10-103202-supplementary-material-SD1.pdf]

## SUPPLEMENTARY FIGURES

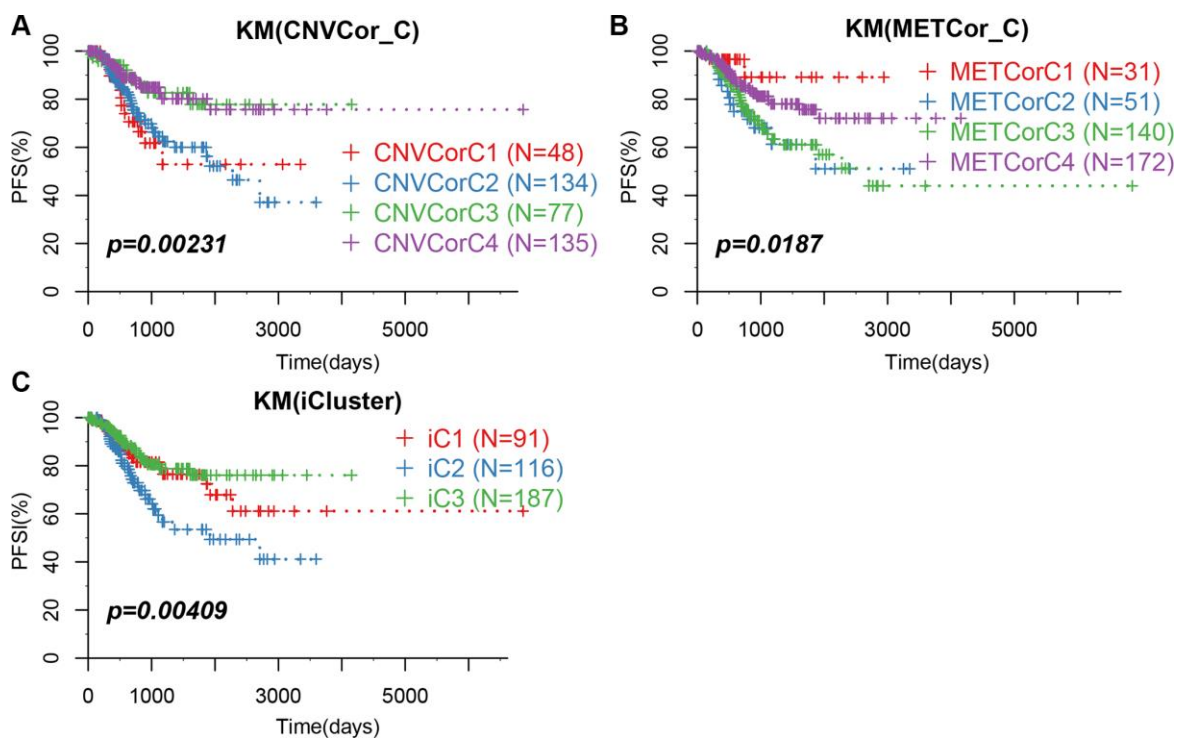

**Supplementary Figure 1.** (A) Progression-free survival among CNVCorC1, CNVCorC2, CNVCorC3 and CNVCorC4. (B) Progression-free survival among METCorC1, METCorC2, METCorC3 and METCorC4. (C) Progression-free survival among iC1, iC2 and iC3.

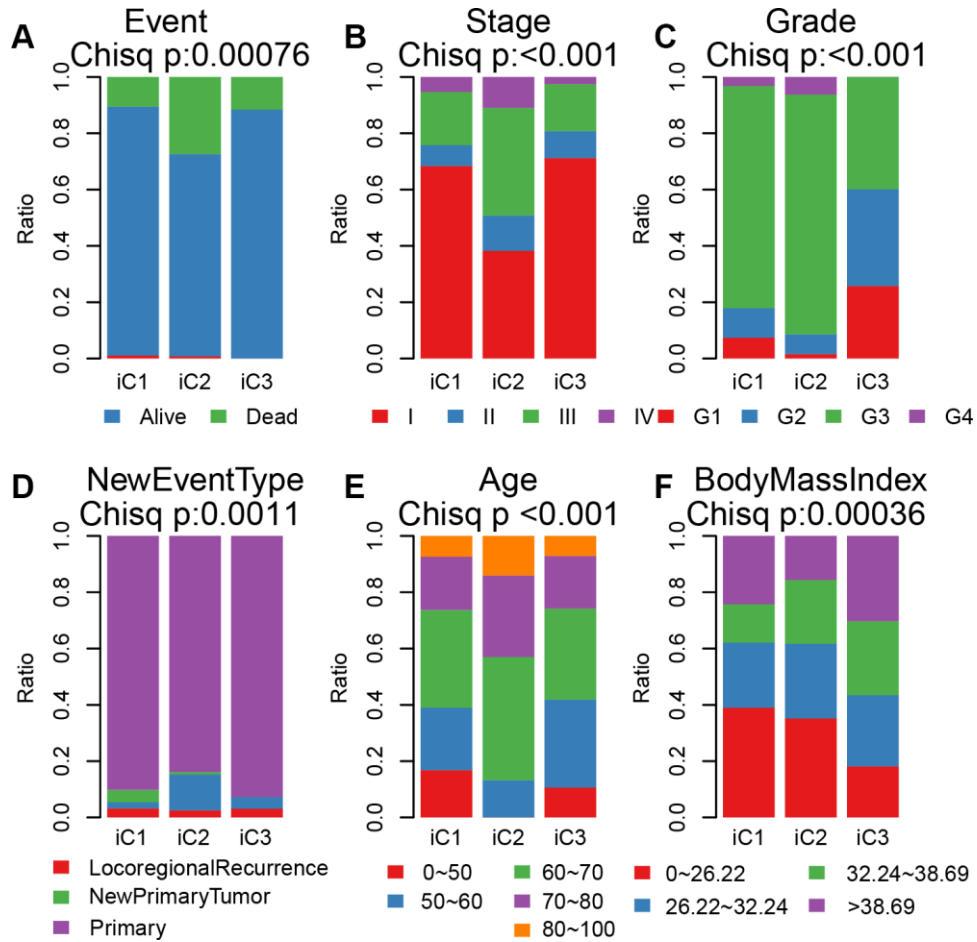

**Supplementary Figure 2.** (A) The distribution of Event in three iC types. (B) The distribution of Stage in three iC types. (C) The distribution of Grade in three iC types. (D) The distribution of NewEventType in three iC types. (E) The distribution of Age in three iC types. (F) The distribution of BodyMassIndex in three iC types.
